# Supplementary material
Source: MDPI journal article supplement (https://www.mdpi.com/2674-0494/2/3/21)
Supplement: s1 [file s1]

## Additional Bibliography

This bibliography is additional to the cited references and covers most of the debate, so far, on extreme wind speeds, extreme value distributions, asymptotic convergence, the relationship between parent and extremes, and mixed distributions. Also included are references to the current focus on the annual rate of independent events and its dependence on wind speed, which is a related issue relevant to the prediction of extremes directly from a serially correlated parent but is outside the scope of the present study.

1. Chiodi, R.; Ricciardelli, F. Three Issues Concerning the Statistics of Mean and Extreme Wind Speeds. *Journal of Wind Engineering and Industrial Aerodynamics* **2014**, *125*, 156–167, doi:10.1016/j.jweia.2013.12.009.
2. Choi, E.C.C.; Hidayat, F.A. Gust Factors for Thunderstorm and Non-Thunderstorm Winds. *Journal of Wind Engineering and Industrial Aerodynamics* **2002**, *90*, 1683–1696, doi:10.1016/S0167-6105(02)00279-9.
3. Cook, N.J. Comment on “Discussion on ‘Generalized Extreme Gust Wind Speeds Distributions by E. Cheng, C. Yeung’ by J.D. Holmes.” *Journal of Wind Engineering and Industrial Aerodynamics* **2004**, *92*, 77–78, doi:10.1016/j.jweia.2003.10.002.
4. Cook, N.J. Confidence Limits for Extreme Wind Speeds in Mixed Climates. *Journal of Wind Engineering and Industrial Aerodynamics* **2004**, *92*, 41–51, doi:10.1016/j.jweia.2003.09.037.
5. Cook, N.J. Technical Note: Calibration of EVA Methods for Peak-over-Threshold Wind Data Using Bootstrapping. *Journal of Wind Engineering and Industrial Aerodynamics* **2013**, *120*, 91–95, doi:10.1016/j.jweia.2013.07.005.
6. Cook, N.J. Technical Note: On Extracting Independent Peak Values from Correlated Time Series for Assessing Extremes. *Journal of Wind Engineering and Industrial Aerodynamics* **2017**, *170*, 274–282, doi:10.1016/j.jweia.2017.09.003.
7. Cook, N.J. Further Discussion of “The Annual Rate of Independent Events for the Analysis of Extreme Wind Speed” by Alessio Torrielli, Maria Pia Repetto & Giovanni Solari. *Journal of Wind Engineering and Industrial Aerodynamics* **2018**, *174*, 458–463, doi:10.1016/j.jweia.2017.08.015.
8. Cook, N.J. Implications of the OEN Mixture Model of the Mean Wind Vector for the Generation of Synthetic Timeseries and for the Assessment of Extremes. *Journal of Wind Engineering and Industrial Aerodynamics* **2021**, *208*, 104424, doi:10.1016/j.jweia.2020.104424.
9. Cook, N.J.; Ian Harris, R. Discussion on Application of the Generalized Pareto Distribution to Extreme Value Analysis in Wind Engineering by J.D. Holmes, W.W. Moriarty. *Journal of Wind Engineering and Industrial Aerodynamics* **2001**, *89*, 215–224, doi:10.1016/S0167-6105(00)00063-5.
10. Cook, N.J.; Ian Harris, R.; Whiting, R. Extreme Wind Speeds in Mixed Climates Revisited.

- Journal of Wind Engineering and Industrial Aerodynamics* **2003**, 91, 403–422, doi:10.1016/S0167-6105(02)00397-5.
11. De Gaetano, P.; Repetto, M.P.; Repetto, T.; Solari, G. Separation and Classification of Extreme Wind Events from Anemometric Records. *Journal of Wind Engineering and Industrial Aerodynamics* **2014**, 126, 132–143, doi:10.1016/j.jweia.2014.01.006.
  12. Diniz, S.M.C.; Sadek, F.; Simiu, E. Wind Speed Estimation Uncertainties: Effects of Climatological and Micrometeorological Parameters. *Probabilistic Engineering Mechanics* **2004**, 19, 361–371, doi:10.1016/j.probengmech.2004.03.003.
  13. Gomes, L.; Vickery, B.J. On the Prediction of Extreme Wind Speeds from the Parent Distribution. *Journal of Wind Engineering and Industrial Aerodynamics* **1977**, 2, 21–36, doi:10.1016/0167-6105(77)90003-4.
  14. Gomes, M.I. Penultimate Limiting Forms in Extreme Value Theory. *Ann Inst Stat Math* **1984**, 36, 71–85, doi:10.1007/BF02481954.
  15. Grigoriu, M. Estimates of Extreme Winds from Short Records. *J. Struct. Eng.* **1984**, 110, 1467–1484, doi:10.1061/(ASCE)0733-9445(1984)110:7(1467).
  16. Guerova, G.; Dimitrova, T.; Georgiev, S. Thunderstorm Classification Functions Based on Instability Indices and GNSS IWV for the Sofia Plain. *Remote Sensing* **2019**, 11, 2988, doi:10.3390/rs11242988.
  17. Gunter, W.S.; Schroeder, J.L. High-Resolution Full-Scale Measurements of Thunderstorm Outflow Winds. *Journal of Wind Engineering and Industrial Aerodynamics* **2015**, 138, 13–26, doi:10.1016/j.jweia.2014.12.005.
  18. Harris, R.I. Gumbel Re-Visited - a New Look at Extreme Value Statistics Applied to Wind Speeds. *Journal of Wind Engineering and Industrial Aerodynamics* **1996**, 59, 1–22, doi:10.1016/0167-6105(95)00029-1.
  19. Harris, R.I. Improvements to the 'Method of Independent Storms'. *Journal of Wind Engineering and Industrial Aerodynamics* **1999**, 80, 1–30, doi:10.1016/S0167-6105(98)00123-8.
  20. Harris, R.I. Comment on "Discussion on 'Generalized Extreme Gust Wind Speeds Distributions by E. Cheng, C. Yeung' by J.D. Holmes" [J. Wind Eng. Ind. Aerodyn. 91 (2003) 965–967]. *Journal of Wind Engineering and Industrial Aerodynamics* **2004**, 92, 79–81, doi:10.1016/j.jweia.2003.10.003.
  21. Harris, R.I. Extreme Value Analysis of Epoch Maxima—Convergence, and Choice of Asymptote. *Journal of Wind Engineering and Industrial Aerodynamics* **2004**, 92, 897–918, doi:10.1016/j.jweia.2004.05.003.
  22. Harris, R.I. Generalised Pareto Methods for Wind Extremes. Useful Tool or Mathematical Mirage? *Journal of Wind Engineering and Industrial Aerodynamics* **2005**, 93, 341–360,

doi:10.1016/j.jweia.2005.02.004.

23. Harris, R.I. Reply to “Discussion of Generalised Pareto Methods for Wind Extremes. Useful Tool or Mathematical Mirage? *Journal of Wind Engineering and Industrial Aerodynamics* **2007**, 95, 137–143, doi:10.1016/j.jweia.2006.05.001.
24. Harris, R.I. A Simulation Method for Macro-Meteorological Wind Speeds with a Forward Weibull Parent Distribution of General Index. *Journal of Wind Engineering and Industrial Aerodynamics* **2017**, 171, 202–206, doi:10.1016/j.jweia.2017.10.004.
25. Harris, R.I. Discussion of “The Annual Rate of Independent Events for the Analysis of Extreme Wind Speed” By Alessio Torrielli, Maria Pia Repetto & Giovanni Solari. *Journal of Wind Engineering and Industrial Aerodynamics* **2017**, 164, 174–178, doi:10.1016/j.jweia.2017.01.015.
26. Harris, R.I. A Simulation Method for the Macro-Meteorological Wind Speed and the Implications for Extreme Value Analysis. *Journal of Wind Engineering and Industrial Aerodynamics* **2014**, 125, 146–155, doi:10.1016/j.jweia.2013.12.003.
27. Karpa, O.; Naess, A. Extreme Value Statistics of Wind Speed Data by the ACER Method. *Journal of Wind Engineering and Industrial Aerodynamics* **2013**, 112, 1–10, doi:10.1016/j.jweia.2012.10.001.
28. Lagomarsino, S.; Piccardo, G.; Solari, G. Statistical Analysis of High Return Period Wind Speeds. *Journal of Wind Engineering and Industrial Aerodynamics* **1992**, 41, 485–496, doi:10.1016/0167-6105(92)90452-G.
29. Lechner, J.A.; Simiu, E.; Heckert, N.A. Assessment of ‘Peaks over Threshold’ Methods for Estimating Extreme Value Distribution Tails. *Structural Safety* **1993**, 12, 305–314, doi:10.1016/0167-4730(93)90059-A.
30. Lechner, J.A.; Leigh, S.D.; Simiu, E. Recent Approaches to Extreme Value Estimation with Application to Wind Speeds. Part I: The Pickands Method. *Journal of Wind Engineering and Industrial Aerodynamics* **1992**, 41, 509–519, doi:10.1016/0167-6105(92)90457-L.
31. Li, S.H. Effect of Disjunct Sampling on Calibration of Design Wind Speed. *Journal of Wind Engineering and Industrial Aerodynamics* **2018**, 183, 283–294, doi:10.1016/j.jweia.2018.11.016.
32. Lombardo, F.T.; Simiu, E. Discussion of “A Comparison of Methods of Extreme Wind Speed Estimation” by Ying An and M.D. Pandey. *Journal of Wind Engineering and Industrial Aerodynamics* **2008**, 96, 2452–2454, doi:10.1016/j.jweia.2008.03.003.
33. Lombardo, F.T.; Main, J.A.; Simiu, E. Automated Extraction and Classification of Thunderstorm and Non-Thunderstorm Wind Data for Extreme-Value Analysis. *Journal of Wind Engineering and Industrial Aerodynamics* **2009**, 97, 120–131, doi:10.1016/j.jweia.2009.03.001.
34. Naess, A.; Gaidai, O. Estimation of Extreme Values from Sampled Time Series. *Structural Safety* **2009**, 31, 325–334, doi:10.1016/j.strusafe.2008.06.021.

35. Palutikof, J.P.; Brabson, B.B.; Lister, D.H.; Adcock, S.T. A Review of Methods to Calculate Extreme Wind Speeds. *Meteorol. App.* **1999**, *6*, 119–132, doi:10.1017/S1350482799001103.
36. Simiu, E. “Generalized Pareto Methods for Wind Extremes. Useful Tool or Mathematical Mirage?” By Ian Harris. *Journal of Wind Engineering and Industrial Aerodynamics* **2007**, *95*, 133–136, doi:10.1016/j.jweia.2006.05.002.
37. Simiu, E.; Filliben, J.J.; Shaver, J.R. Short-Term Records and Extreme Wind Speeds. *J. Struct. Div.* **1982**, *108*, 2571–2577, doi:10.1061/JSDEAG.0006081.
38. Simiu, E.; Heckert, N.A.; Filliben, J.J.; Johnson, S.K. Extreme Wind Load Estimates Based on the Gumbel Distribution of Dynamic Pressures: An Assessment. *Structural Safety* **2001**, *23*, 221–229, doi:10.1016/S0167-4730(01)00016-9.
39. Torrielli, A.; Repetto, M.P.; Solari, G. The Annual Rate of Independent Events – A Key Interpretation for Traditional Extreme Value Distributions of Wind Velocity. *Wind Energy* **2022**, *25*, 1188–1202, doi:10.1002/we.2721.
40. Torrielli, A.; Repetto, M.P.; Solari, G. Response to the Discussion on “The Annual Rate of Independent Events for the Analysis of Extreme Wind Speed, by R. Ian Harris.” *Journal of Wind Engineering and Industrial Aerodynamics* **2017**, *164*, 179–181, doi:10.1016/j.jweia.2017.01.016.
41. Torrielli, A.; Repetto, M.P.; Solari, G. Response to the Further Discussion on “The Annual Rate of Independent Events for the Analysis of Extreme Wind Speed, by N. Cook.” *Journal of Wind Engineering and Industrial Aerodynamics* **2018**, *174*, 464–465, doi:10.1016/j.jweia.2017.08.016.
42. Torrielli, A.; Repetto, M.P.; Solari, G. The Annual Rate of Independent Events for the Analysis of the Extreme Wind Speed. *Journal of Wind Engineering and Industrial Aerodynamics* **2016**, *156*, 104–114, doi:10.1016/j.jweia.2016.07.010.
43. An, Y.; Pandey, M.D. A Comparison of Methods of Extreme Wind Speed Estimation. *Journal of Wind Engineering and Industrial Aerodynamics* **2005**, *93*, 535–545, doi:10.1016/j.jweia.2005.05.003.
44. An, Y.; Pandey, M.D. Reply to Discussion of “A Comparison of Methods of Extreme Wind Speed Estimation” [J. Wind Eng. Ind. Aerodyn. 93 (2005) 535–545]. *Journal of Wind Engineering and Industrial Aerodynamics* **2008**, *96*, 2455–2458, doi:10.1016/j.jweia.2008.08.001.
